# Supplementary material
Source: publisher figshare collection journal article supplement (https://sage.figshare.com/ndownloader/files/44205903)
Supplement: Supplementary file 1 [file 44205903]

## Sheet: Taul1
Supplemental Table 1. Frequencies of Physical Education Orientation of a Coach
Physical Education Orientation of a Coach	Strongly disagree	Somewhat disagree	Neither agree nor disagree	Somewhat agree	Strongly agree
Daily activities have an impact on development as an athlete				23.1	76.9
Independent training has an impact on development as an athlete					100.0
Only discipline-related training has an impact on development as an athlete	57.7	38.5		3.8
Education for a physically active lifestyle is the task of the sports club	11.5	30.8	15.4	23.1	19.2
The coach plays an important role in promoting the physically active lifestyle among players			15.4	61.5	23.1
In coaching, players should be further instructed to engage in PA adequately and diversely		20.0	12.0	44.0	24.0
The players in my team engage in enough PA for their health	3.8	19.2	30.8	34.6	11.5
The players in my team engage in enough PA to develop as hockey players	3.8	19.2	38.5	26.9	11.5
My own behavior influences the behavior of the players				26.9	73.1
